# Supplementary material
Source: PubMed Central journal article supplement (PMC3962664)
Supplement: NIHMS555520-supplement-1.pdf [file NIHMS555520-supplement-1.pdf]

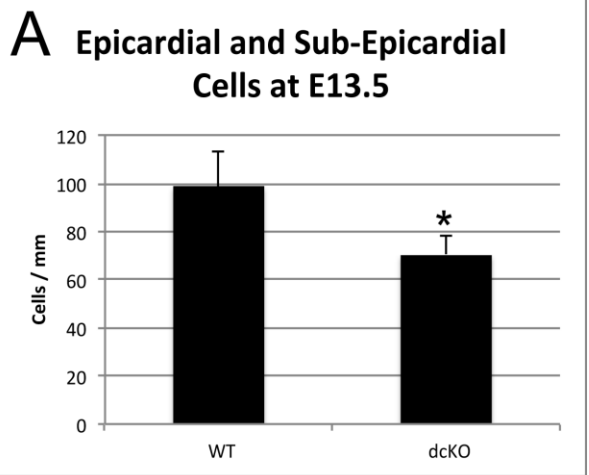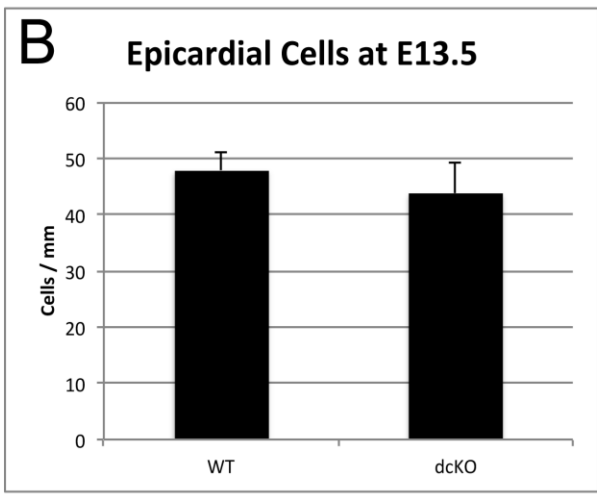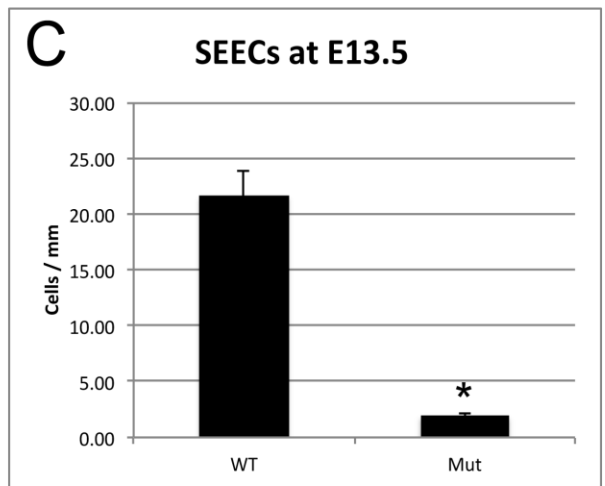

657

658

659

660 **Supplemental Figure 1. *WT1(RP23-8C14)-Cre* labels the epicardium**

661 Immunofluorescent staining of E12.5 hearts with antibodies against WT1 (A) and eYFP  
662 (B) controlled by *WT1(RP23-8C14)-Cre*. We found extensive co-staining in the  
663 epicardium (C). Nuclei were labeled with DAPI (Blue, C).

664

665

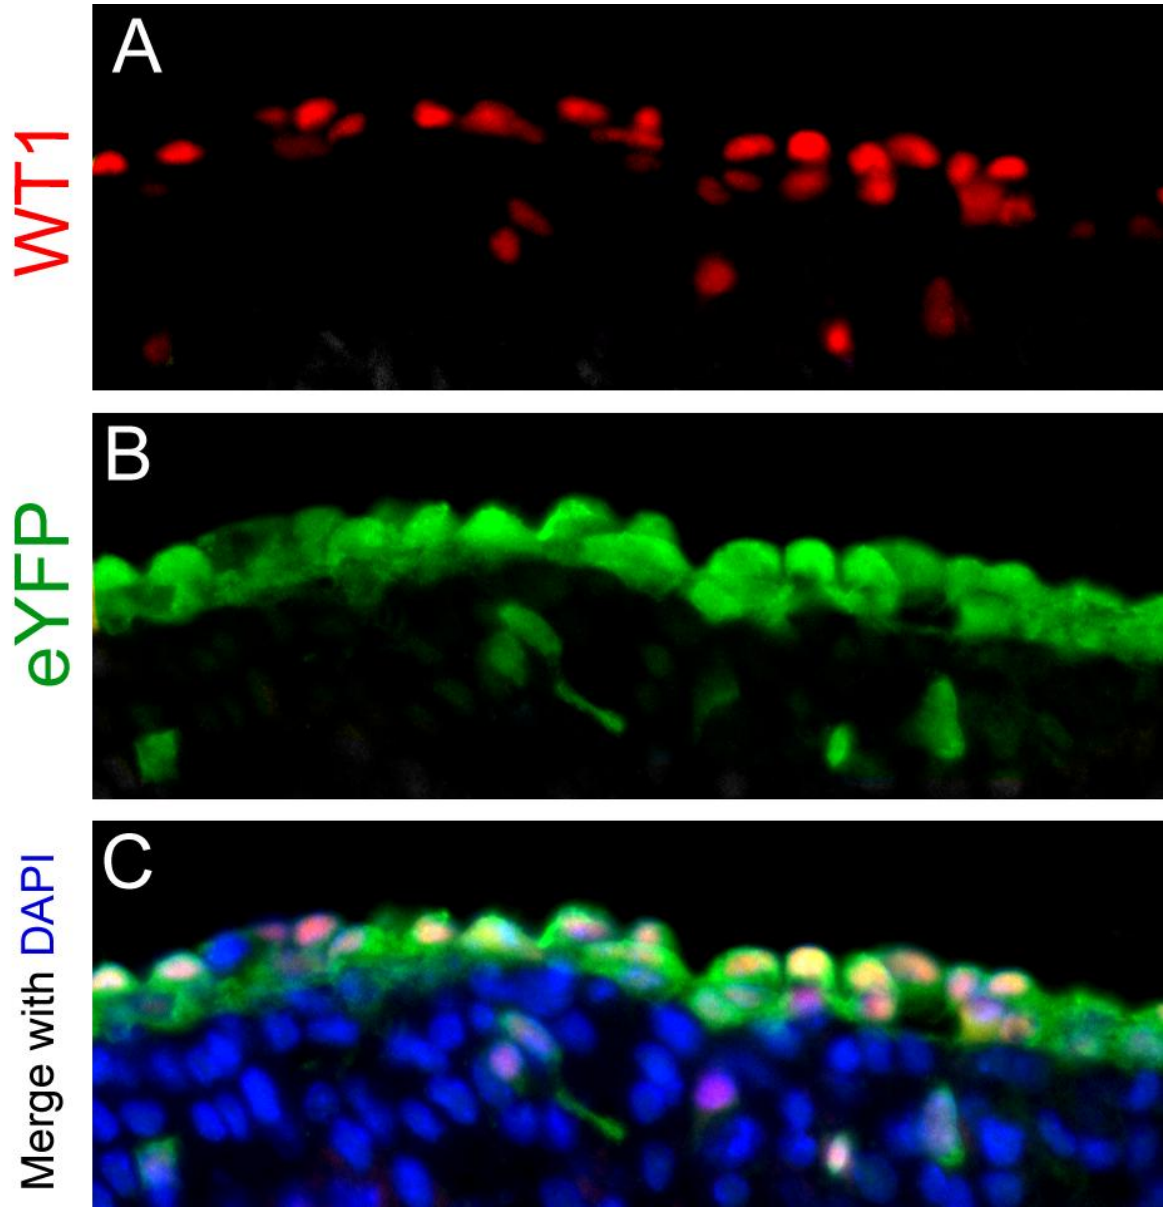

666

667

668 **Supplemental Figure 2. WT1(RP23-8C14)-Cre disrupts expression of GATA6 and**  
669 **GATA4 in epicardial derived cells**

670 The expression of GATA6 and GATA4 in epicardial derived cells at E14.5 was visualized  
671 with immunofluorescence for GATA6 (A-B) and GATA4 (C-D). GATA6 (A) and GATA4  
672 (C) were found to be expressed in epicardial and epicardial derived cells (arrows) of wild  
673 type hearts. In dcKO hearts, there is an observable loss of GATA6 (B) and GATA4 (D)  
674 expression in epicardial derived cells (arrows) when compared to the wild type. Hearts  
675 were co-stained against eYFP (Green) and DAPI (Blue) to visualize nuclei.

676

677

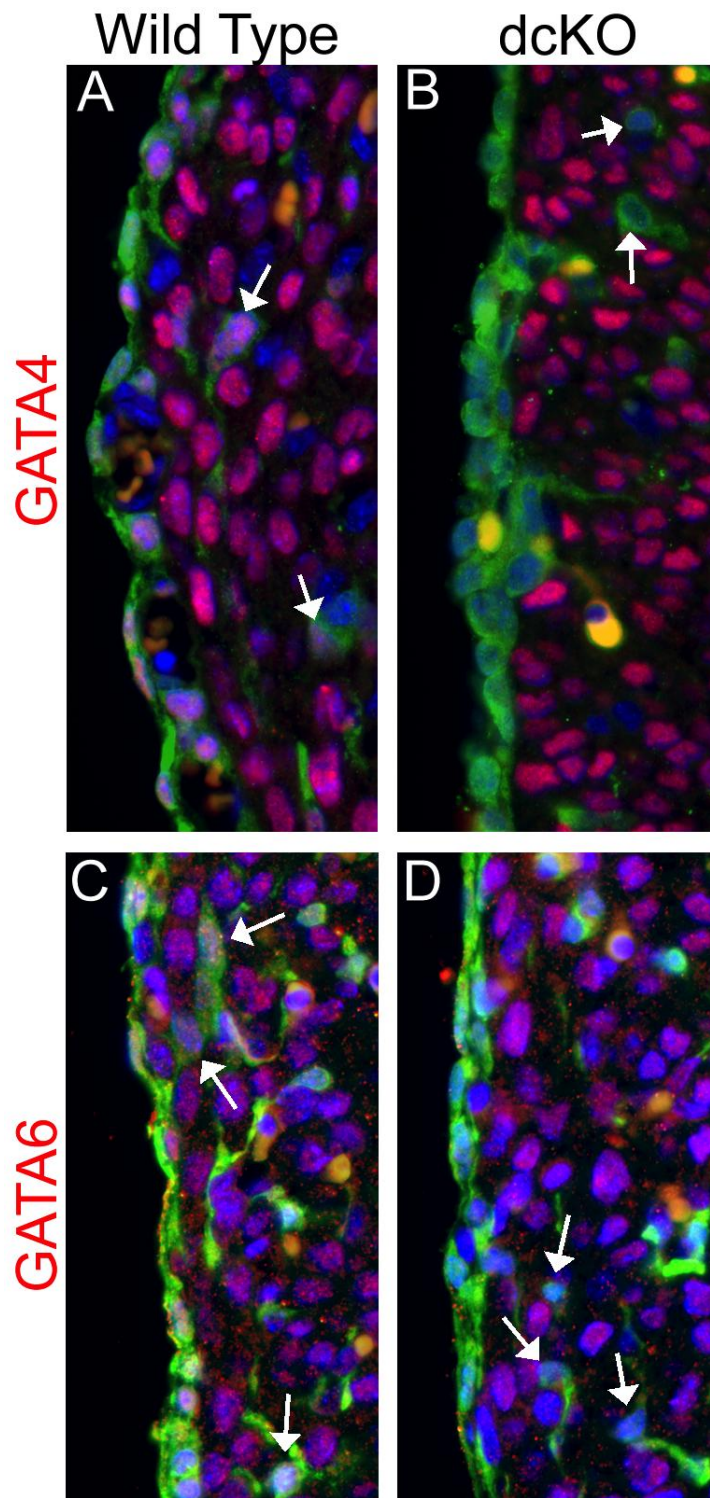

678

679

680

681

682 **Supplemental Figure 3. dckO embryos exhibit polydactyly**

683 dckO embryos (C) at E14.5 appear grossly normal compared to wildtype (A). dckO hind  
684 limbs demonstrate polydactyl (arrow, D). (A,C) and (B,D) images were taken at the same  
685 magnification respectively.

686

E14.5

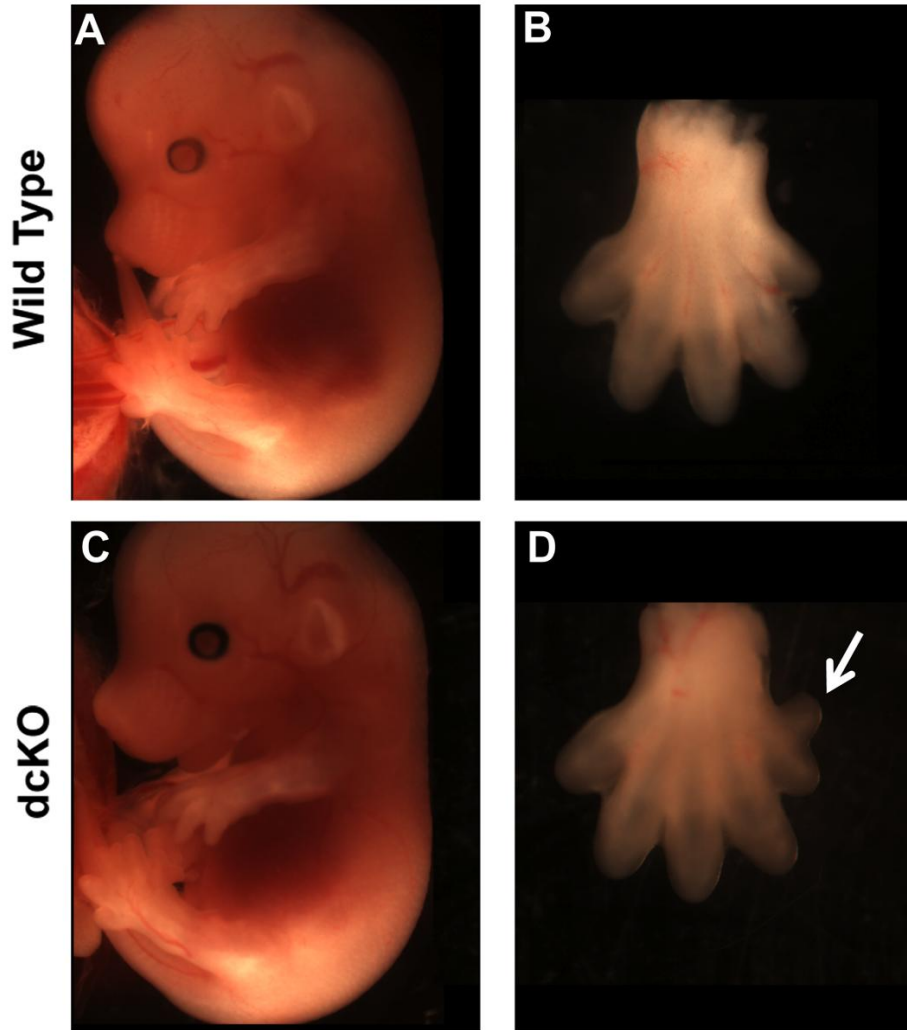

687

688

689 **Supplemental Figure 4. ERG Labels Endothelial Cells**

690 Immunofluorescent staining of an E10.5 *Tie2-Cre<sup>+</sup>/Rosa26R.EYFP* heart with antibodies  
691 against eYFP (A, Green) and ERG (B, Red) shows a high level of co-staining (C)  
692 between EYFP and ERG. DAPI (Blue) was used to label nuclei.

693



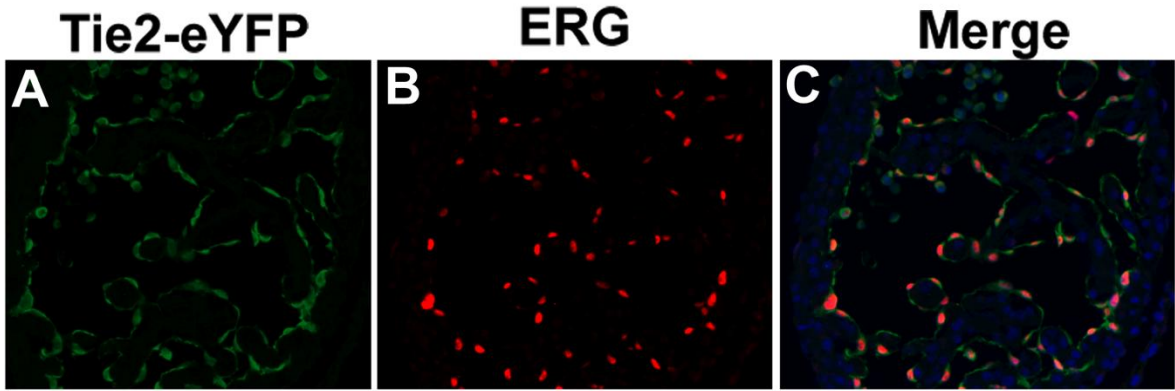

694  
695

696 **Supplemental Figure 5. Epicardial GATA regulate plexus formation via SHH**

697 (A) E13.5 wild type heart immunofluorescently stained for SHH (red) showing expression  
698 in the sub-epicardium (Arrows). (B) E13.5 dcKO heart shows SHH expression is lost in  
699 the sub-epicardium. E11.5 whole hearts were isolated, cultured, and  
700 immunofluorescently stained to quantify the percentage of SEECs (C-D). The  
701 epicardium/sub-epicardium of WT hearts were found to contain 5.96% SEECs (C, F),  
702 while the dcKO hearts were found to contain 2.05% SEECs (D,F,\*=p<0.05). Addition of  
703 SHH to the dcKO (E,F) increased the percentage of SEECs in the epicardium/sub-  
704 epicardium to 4.62% resulting in no significant (ns) difference between the WT and  
705 dcKO + SHH (F). Sections were counterstained with sarcomeric myosin (MF20, Green)  
706 to visualize the myocardium DAPI to label nuclei. Error bars represent standard  
707 deviation. (G) RT-PCR results showing no significant change in the relative expression  
708 of *shh* between the wild type and dcKO hearts at E11.5 and E12.5. Values are relative  
709 to the expression of *shh* in the wild type hearts at each age. Error bars represent  
710 standard deviation.

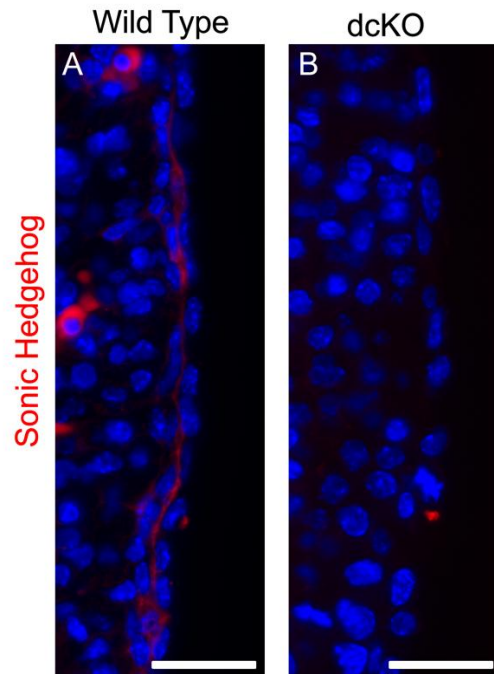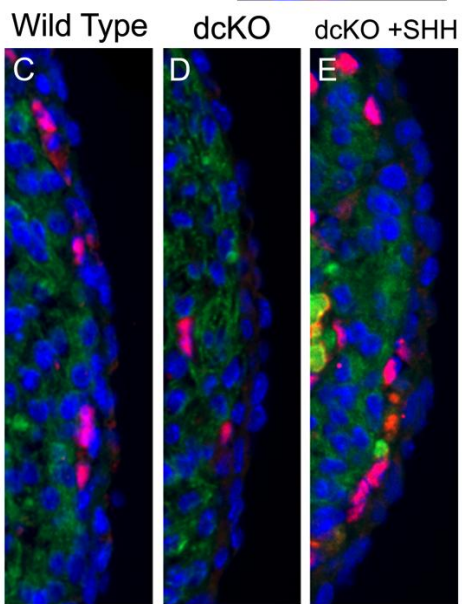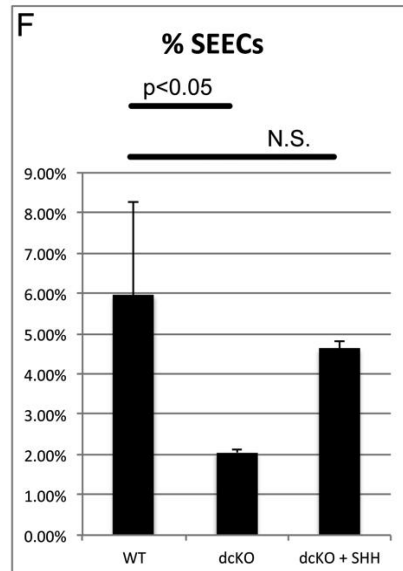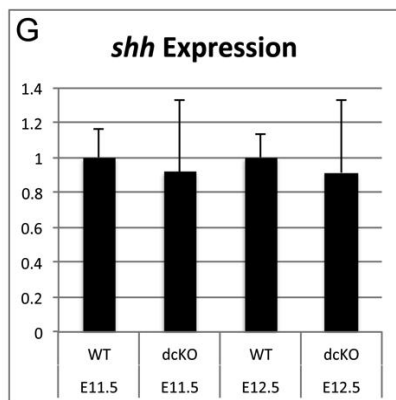

712 **Supplemental Methods:**

713 **Whole Heart Culture Assay**

714 Similar to Lavine et al., E11.5 hearts were isolated in Hank's buffered salt solution.  
715 Hearts were placed in glass scintillation vials with 1 mL of media (DMEM / 10% FBS / 2  
716 mg/L heparin / penicillin and streptomycin) (Lavine et al., 2006). For SHH rescue, media  
717 was supplemented with 1 mg/L SHH (R&D Systems). Hearts were incubated for 48hrs  
718 on a rocker at 37°C/5% CO<sub>2</sub>. Following incubation, hearts were fixed, embedded, and  
719 stained. SEECs were quantified in the same manner as Figure 5.

720

721 **RT-PCR**

722 Embryonic hearts were isolated from time pregnant females and processed for RNA  
723 (Qiagen RNeasy Minikit) and cDNA template (SABiosciences RT<sup>2</sup> First Strand Kit) using  
724 published protocols. Samples were probed using SYBR Green with ROX reference  
725 (SABiosciences RT<sup>2</sup> Real-Time SYBR Green/Rox Master Mix PA-012) using 100nm  
726 primer oligos with standard protocols in a Stratagene Mx3005P Real-Time PCR System.  
727 Primers utilized are available upon request. Samples were normalized based on *Gapdh*  
728 expression.

729

730

731
